# Supplementary material
Source: PubMed Central journal article supplement (PMC5584704)

Figure S1

(a) Changes in Collateral Perfusion

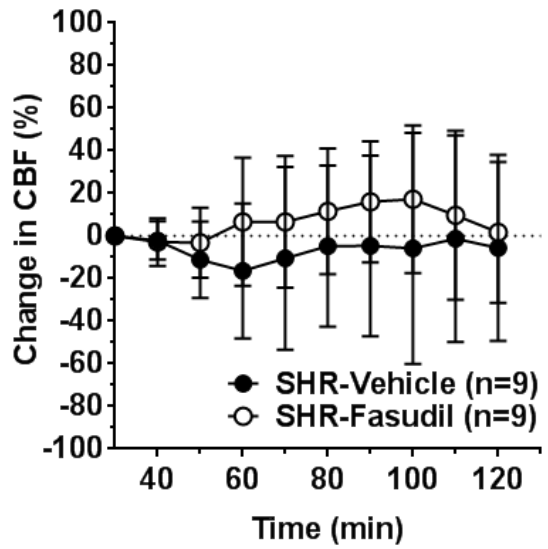

(b) Changes in core MCA Perfusion

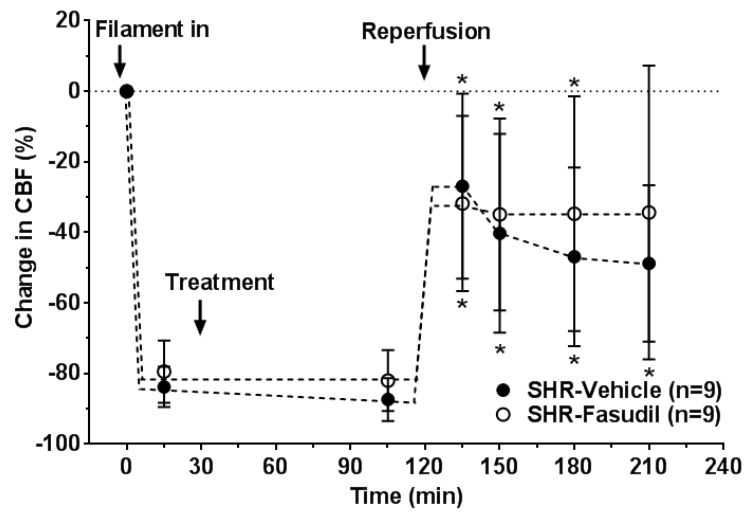

(c) Acute Brain Injury Volume

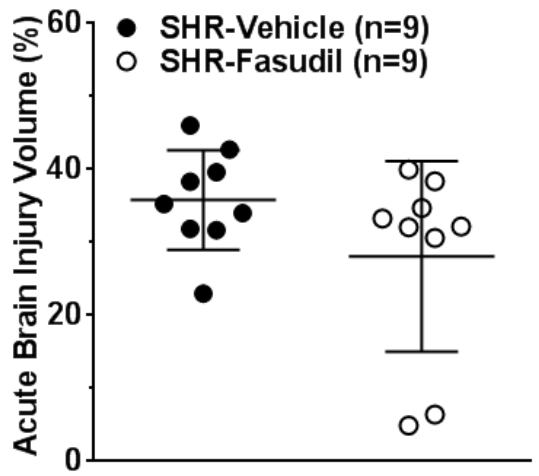

(d) Percent Tone of Isolated PAs

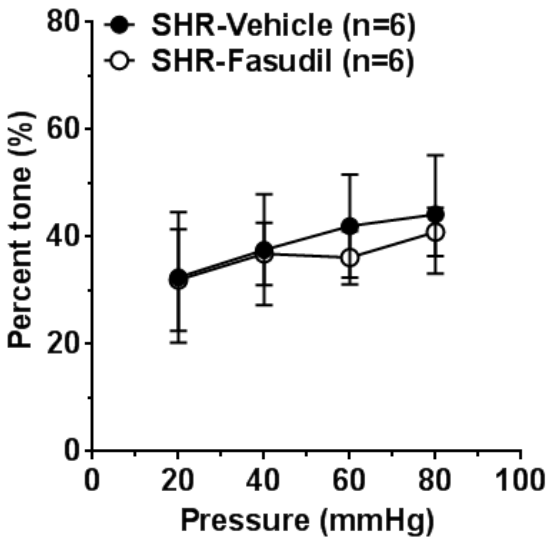

Supplement: Supplementary_Material_665.pdf [file Supplementary_Material_665.pdf]
